# Supplementary material for: Dual Inhibition of GLUT1 and the ATR/CHK1 Kinase Axis Displays Synergistic Cytotoxicity in KRAS -Mutant Cancer Cells
Source: Oxford University Press journal article supplement (doi:10.1158/0008-5472.can-18-3959), 2019-08-12
Supplement: 00085472can183959-sup-213944_2_supp_5682748_pvtsth.xlsx [file 00085472can183959-sup-213944_2_supp_5682748_pvtsth.xlsx]

## Sheet: WZB117_VE822
cell line
HCC44	Drug1:	WZB117
	Drug2:	VE822
	ConcUnit:	µM
		0	0.1	0.25	1
	0	100	112.419	102.97	76.9395
	5	96.2019	79.1228	79.5071	45.631
	10	82.3838	48.519	43.091	25.777
	25	48.8354	23.0763	16.1231	13.1284
A549	Drug1:	WZB117
	Drug2:	VE822
	ConcUnit:	µM
		0	0.1	0.25	1
	0	100	149.872	105.897	106.857
	5	189.906	149.882	137.101	97.8163
	10	116.893	121.363	68.6617	63.6931
	25	37.2853	48.7246	53.602	33.4252
639V	Drug1:	WZB117
	Drug2:	VE822
	ConcUnit:	µM
		0	0.1	0.25	1
	0	100	112.102	116.182	116.073
	5	103.806	107.634	109.47	103.776
	10	105.826	94.9818	95.9135	61.5574
	25	56.3819	31.1832	19.0978	12.4271
H1975	Drug1:	WZB117
	Drug2:	VE822
	ConcUnit:	µM
		0	0.1	0.25	1
	0	100	93.083	80.5583	73.0474
	5	106.629	92.2972	82.4414	70.2779
	10	94.0953	83.8912	66.3639	54.2386
	25	72.808	53.9962	38.1398	31.1245
Calu1	Drug1:	WZB117
	Drug2:	VE822
	ConcUnit:	µM
		0	0.1	0.25	1
	0	100	100.093	89.6156	73.0715
	5	100.628	93.6394	78.743	62.8284
	10	88.5388	81.6732	68.44	53.8238
	25	64.8682	62.0406	48.0593	43.5074
MelJuso	Drug1:	WZB117
	Drug2:	VE822
	ConcUnit:	µM
		0	0.1	0.25	1
	0	100	110.016	116.543	113.389
	5	105.132	97.3936	101.846	108.057
	10	96.7742	92.6379	110.016	114.078
	25	104.119	102.632	111.411	55.884
A498	Drug1:	WZB117
	Drug2:	VE822
	ConcUnit:	µM
		0	0.1	0.25	1
	0	100	64.1224	28.9416	8.92999
	5	96.5713	60.4429	22.603	8.20431
	10	82.1485	42.5465	12.7376	232.973
	25	61.1751	18.2192	7.59227	11.373
MFE296	Drug1:	WZB117
	Drug2:	VE822
	ConcUnit:	µM
		0	0.1	0.25	1
	0	100	109.178	104.795	102.475
	5	95.0325	95.6459	86.2463	64.7982
	10	86.257	82.6444	53.5694	24.8525
	25	63.2863	35.8825	15.2786	9.33652

## Sheet: WZB117_PF477736
cell line
HCC44	Drug1:	WZB117
	Drug2:	PF477736
	ConcUnit:	µM
		0	0.2	0.5	2
	0	100	117.585	120.765	84.5421
	5	96.2019	88.47	99.2763	82.2811
	10	82.3838	88.4549	78.8494	40.629
	25	48.8354	38.7801	41.3805	13.0223
A549	Drug1:	WZB117
	Drug2:	PF477736
	ConcUnit:	µM
		0	0.2	0.5	2
	0	100	129.954	137.902	141.908
	5	189.906	136.049	123.578	109.642
	10	116.893	115.365	102.33	54.0873
	25	37.2853	53.6464	37.2733	26.3674
639V	Drug1:	WZB117
	Drug2:	PF477736
	ConcUnit:	µM
		0	0.2	0.5	2
	0	100	104.986	107.276	60.1427
	5	103.806	97.3851	95.8422	46.4736
	10	105.826	93.487	68.2504	19.0769
	25	56.3819	42.8512	25.0975	9.60819
H1975	Drug1:	WZB117
	Drug2:	PF477736
	ConcUnit:	µM
		0	0.2	0.5	2
	0	100	106.134	107.696	82.6222
	5	106.629	105.248	109.964	85.6851
	10	94.0953	95.9141	90.6301	72.4734
	25	72.808	68.4198	66.8783	54.8553
Calu1	Drug1:	WZB117
	Drug2:	PF477736
	ConcUnit:	µM
		0	0.2	0.5	2
	0	100	107.175	100.521	63.1846
	5	100.628	92.6037	90.3732	59.4369
	10	88.5388	82.0461	75.7258	56.8075
	25	64.8682	65.5804	48.4918	34.3546
MelJuso	Drug1:	WZB117
	Drug2:	PF477736
	ConcUnit:	µM
		0	0.2	0.5	2
	0	100	134.387	86.1495	62.2114
	5	105.132	121.391	81.1268	63.2851
	10	96.7742	106.756	65.7166	58.3268
	25	104.119	66.6321	46.7264	45.5322
A498	Drug1:	WZB117
	Drug2:	VE822
	ConcUnit:	µM
		0	0.2	0.5	2
	0	100	86.0639	39.0072	10.3894
	5	96.5713	81.9341	42.2334	10.1234
	10	82.1485	66.2016	28.9254	8.14427
	25	61.1751	20.6478	10.7711	7.56019
MFE296	Drug1:	WZB117
	Drug2:	PF477736
	ConcUnit:	µM
		0	0.2	0.5	2
	0	100	95.1458	59.1636	46.1559
	5	95.0325	77.0827	42.303	40.8114
	10	86.257	57.0522	30.294	42.6873
	25	63.2863	21.207	19.7604	38.3613

## Sheet: WZB117_CHIR99021
cell line
HCC44	Drug1:	WZB117
	Drug2:	CHIR99021
	ConcUnit:	µM
		0	2	5	15
	0	100	128.682	106.036	22.107
	5	96.2019	118.317	90.3625	17.9801
	10	82.3838	92.0448	67.8493	11.4918
	25	48.8354	47.2038	34.6016	4.29503
A549	Drug1:	WZB117
	Drug2:	CHIR99021
	ConcUnit:	µM
		0	2	5	15
	0	100	109.929	93.124	108.835
	5	189.906	141.671	112.662	99.8519
	10	116.893	162.645	120.295	131.779
	25	37.2853	100.605	84.3988	78.9733
639V	Drug1:	WZB117
	Drug2:	CHIR99021
	ConcUnit:	µM
		0	2	5	15
	0	100	108.445	124.864	97.2869
	5	103.806	95.0362	105.706	95.96
	10	105.826	87.9227	100.653	80.9401
	25	56.3819	68.9732	71.4144	41.149
H1975	Drug1:	WZB117
	Drug2:	CHIR99021
	ConcUnit:	µM
		0	2	5	15
	0	100	86.2639	70.1627	50.7855
	5	106.629	84.4778	65.8033	45.9521
	10	94.0953	75.7909	55.8	43.524
	25	72.808	61.2777	47.2097	34.0097
Calu1	Drug1:	WZB117
	Drug2:	CHIR99021
	ConcUnit:	µM
		0	2	5	15
	0	100	106.144	104.666	79.5922
	5	100.628	93.0983	87.9504	68.3503
	10	88.5388	81.6503	83.4957	68.4385
	25	64.8682	53.4355	64.2508	34.7828
MelJuso	Drug1:	WZB117
	Drug2:	CHIR99021
	ConcUnit:	µM
		0	2	5	15
	0	100	113.275	117.412	99.584
	5	105.132	108.408	114.938	96.5202
	10	96.7742	101.364	105.022	93.6882
	25	104.119	87.0599	99.6041	85.7662
A498	Drug1:	WZB117
	Drug2:	VE822
	ConcUnit:	µM
		0	2	5	15
	0	100	79.8126	65.5313	27.564
	5	96.5713	76.9749	60.6968	26.2931
	10	82.1485	62.7899	51.1564	19.3173
	25	61.1751	46.9381	35.9863	15.0661
MFE296	Drug1:	WZB117
	Drug2:	CHIR99021
	ConcUnit:	µM
		0	2	5	15
	0	100	114.673	111.544	102.449
	5	95.0325	101.262	95.3027	94.6039
	10	86.257	83.3384	80.5448	76.7344
	25	63.2863	58.2756	48.8478	47.0743

## Sheet: Dorsomorphin_WZB117
cell line
HCC44	Drug1:	Dorsomorphin-HCI
	Drug2:	WZB117
	ConcUnit:	µM
		0	5	10	25
	0	100	111.71	119.918	102.908
	0.5	124.137	131.688	134.976	121.859
	2	103.181	106.154	102.878	75.7067
	3.5	42.5549	35.3248	28.9052	25.8084
A549	Drug1:	Dorsomorphin-HCI
	Drug2:	WZB117
	ConcUnit:	µM
		0	5	10	25
	0	100	106.884	128.89	92.2815
	0.5	113.955	115.611	128.831	103.098
	2	99.7277	103.325	104.56	83.235
	3.5	87.956	83.9057	77.4673	69.2827
639V	Drug1:	Dorsomorphin-HCI
	Drug2:	WZB117
	ConcUnit:	µM
		0	5	10	25
	0	100	112.807	132.907	86.1731
	0.5	111.536	113.988	136.917	82.7247
	2	104.746	109.672	118.374	75.952
	3.5	101.24	104.045	108.522	65.4053
H1975	Drug1:	Dorsomorphin-HCI
	Drug2:	WZB117
	ConcUnit:	µM
		0	5	10	25
	0	100	105.827	102.544	75.5959
	0.5	114.215	123.563	116.32	75.617
	2	78.1328	75.3531	77.7528	51.6866
	3.5	37.5138	32.2596	28.4803	30.8099
Calu1	Drug1:	Dorsomorphin-HCI
	Drug2:	WZB117
	ConcUnit:	µM
		0	5	10	25
	0	100	103.547	87.1337	54.1178
	0.5	110.41	100.386	95.1878	71.2087
	2	95.8655	97.3071	88.3791	64.8792
	3.5	75.5523	79.7373	75.4738	66.4818
MelJuso	Drug1:	Dorsomorphin-HCI
	Drug2:	WZB117
	ConcUnit:	µM
		0	5	10	25
	0	100	117.191	108.304	108.179
	0.5	97.1207	99.3356	104.92	102.29
	2	83.3888	88.8939	81.072	83.5481
	3.5	76.345	75.5763	82.2995	75.6828
A498	Drug1:	Dorsomorphin-HCI
	Drug2:	WZB117
	ConcUnit:	µM
		0	5	10	25
	0	100	110.399	97.0393	62.7962
	0.5	109.96	118.551	109.327	68.1978
	2	86.0795	96.5504	78.2004	53.3087
	3.5	64.4673	65.581	56.4182	48.1598
MFE296	Drug1:	Dorsomorphin-HCI
	Drug2:	WZB117
	ConcUnit:	µM
		0	5	10	25
	0	100	93.3785	97.6387	57.2612
	0.5	100.888	91.616	86.0503	61.1893
	2	80.652	81.4654	80.4009	59.6442
	3.5	67.3109	69.0721	63.2716	52.334

## Sheet: Sorafenib_AZD6244
cell line
HCC44	Drug1:	Sorafenib
	Drug2:	AZD6244
	ConcUnit:	µM
		0	2	5	15
	0	100	88.4763	86.3748	82.4911
	0.5	107.84	88.0524	71.9103	28.2672
	2	101.694	68.7464	53.2701	16.4749
	5	92.7124	59.1782	37.8027	15.0372
A549	Drug1:	Sorafenib
	Drug2:	AZD6244
	ConcUnit:	µM
		0	2	5	15
	0	100	132	109.234	87.8907
	0.5	99.9261	103.936	85.102	58.4937
	2	92.057	87.0504	72.1538	48.8936
	5	96.9864	94.6038	68.2809	56.1418
639V	Drug1:	Sorafenib
	Drug2:	AZD6244
	ConcUnit:	µM
		0	2	5	15
	0	100	125.264	117.98	117.088
	0.5	102.194	121.213	105.127	101.784
	2	94.8753	106.907	98.5917	92.3297
	5	87.4188	111.127	99.3979	109.934
H1975	Drug1:	Sorafenib
	Drug2:	AZD6244
	ConcUnit:	µM
		0	2	5	15
	0	100	77.4371	88.4396	73.4656
	0.5	114.217	85.6049	86.8525	72.0175
	2	108.685	67.8021	91.7334	74.7852
	5	86.6156	52.7478	65.0304	46.4267
Calu1	Drug1:	Sorafenib
	Drug2:	AZD6244
	ConcUnit:	µM
		0	2	5	15
	0	100	102.783	86.7527	66.1654
	0.5	107.469	90.4715	66.7409	62.1445
	2	100.368	68.2405	57.7768	53.3625
	5	73.2476	51.4679	50.1111	48.063
MelJuso	Drug1:	Sorafenib
	Drug2:	AZD6244
	ConcUnit:	µM
		0	2	5	15
	0	100	116.05	79.4014	76.0657
	0.5	107.981	81.3125	67.8679	50.279
	2	97.6078	57.3005	51.0716	32.7871
	5	104.119	37.1582	41.3269	18.6816
A498	Drug1:	Sorafenib
	Drug2:	AZD6244
	ConcUnit:	µM
		0	2	5	15
	0	100	77.6724	65.6799	62.1753
	0.5	115.281	69.519	57.3786	52.8293
	2	104.837	49.4792	49.1931	43.0293
	5	66.9113	32.0667	31.787	25.0368
MFE296	Drug1:	Sorafenib
	Drug2:	AZD6244
	ConcUnit:	µM
		0	2	5	15
	0	100	116.05	91.5992	90.0899
	0.5	80.2491	97.4623	82.5452	84.5976
	2	61.4293	78.3507	72.215	58.6564
	5	28.843	28.6362	14.3409	31.9887

## Sheet: Bosutinib_MK1775
cell line
HCC44	Drug1:	Bosutinib
	Drug2:	MK1775
	ConcUnit:	µM
		0	0.05	0.25	0.5
	0	100	135.142	114.556	103.531
	0.3	99.3894	104.011	109.164	90.9549
	1	94.1955	104.13	95.1458	58.3726
	3	79.0913	83.0942	51.3128	22.144
A549	Drug1:	Bosutinib
	Drug2:	MK1775
	ConcUnit:	µM
		0	0.05	0.25	0.5
	0	100	125.984	115.739	111.992
	0.3	121.51	121.873	120.156	105.911
	1	106.615	103.927	98.7714	85.3045
	3	85.0746	85.4202	77.6355	63.7115
639V	Drug1:	Bosutinib
	Drug2:	MK1775
	ConcUnit:	µM
		0	0.05	0.25	0.5
	0	100	131.722	137.719	109.674
	0.3	118.045	115.266	107.093	69.3962
	1	99.298	104.269	66.813	39.3863
	3	93.0695	97.6725	46.9457	27.6267
H1975	Drug1:	Bosutinib
	Drug2:	MK1775
	ConcUnit:	µM
		0	0.05	0.25	0.5
	0	100	119.718	62.4126	48.0123
	0.3	126.561	112.801	48.9208	35.349
	1	90.7171	64.4638	27.1454	22.7974
	3	49.3112	25.8021	14.9352	12.8231
Calu1	Drug1:	Bosutinib
	Drug2:	MK1775
	ConcUnit:	µM
		0	0.05	0.25	0.5
	0	100	97.9888	77.3469	60.4311
	0.3	111.044	97.1094	69.434	58.1903
	1	93.6733	84.0623	55.9005	46.0527
	3	59.6341	52.6539	39.829	30.1953
MelJuso	Drug1:	Bosutinib
	Drug2:	MK1775
	ConcUnit:	µM
		0	0.05	0.25	0.5
	0	100	118.034	143.484	106.83
	0.3	109.148	117.595	108.317	75.9047
	1	97.9925	117.681	63.3965	40.5832
	3	97.0325	110.348	47.7169	44.9248
A498	Drug1:	Bosutinib
	Drug2:	MK1775
	ConcUnit:	µM
		0	0.05	0.25	0.5
	0	100	119.905	20.5854	14.7454
	0.3	105.412	110.203	23.7487	17.1998
	1	71.3566	66.1357	17.6255	16.8836
	3	34.0036	32.2649	16.0747	17.189
MFE296	Drug1:	Bosutinib
	Drug2:	MK1775
	ConcUnit:	µM
		0	0.05	0.25	0.5
	0	100	110.735	116.043	113.691
	0.3	101.202	101.99	96.3973	104.602
	1	91.9686	98.3076	86.1161	88.9798
	3	89.2912	80.1352	78.3921	70.7188

## Sheet: CHIR99021_Etoposide
cell line
HCC44	Drug1:	CHIR99021
	Drug2:	Etoposide
	ConcUnit:	µM
		0	0.2	1	5
	0	100	102.652	101.099	91.765
	2	119.226	122.745	119.295	51.0158
	5	127.788	128.191	85.3194	33.0895
	15	26.0659	25.8045	11.928	13.8281
A549	Drug1:	CHIR99021
	Drug2:	Etoposid
	ConcUnit:	µM
		0	0.2	1	5
	0	100	107.11	97.5485	95.1844
	2	101.332	103.081	104.82	93.0186
	5	111.363	110.063	108.12	95.0466
	15	116.286	108.319	106.739	83.2408
639V	Drug1:	CHIR99021
	Drug2:	Etoposid
	ConcUnit:	µM
		0	0.2	1	5
	0	100	110.731	113.213	112.151
	2	105.268	105.794	108.478	75.2129
	5	117.565	121.03	115.123	52.5412
	15	116.119	113.611	116.421	36.4545
H1975	Drug1:	CHIR99021
	Drug2:	Etoposid
	ConcUnit:	µM
		0	0.2	1	5
	0	100	99.2122	94.9831	71.3006
	2	96.3609	83.3616	81.5007	58.0365
	5	78.4399	73.6626	67.7763	46.8113
	15	51.0327	48.5837	49.0767	43.7185
Calu1	Drug1:	CHIR99021
	Drug2:	Etoposid
	ConcUnit:	µM
		0	0.2	1	5
	0	100	105.938	91.6856	76.056
	2	102.152	95.0772	87.2002	66.5063
	5	86.7474	83.8379	66.5247	56.7689
	15	72.4276	64.855	57.8711	50.8325
MelJuso	Drug1:	CHIR99021
	Drug2:	Etoposid
	ConcUnit:	µM
		0	0.2	1	5
	0	100	106.514	102.146	95.2993
	2	115.141	101.916	113.864	96.8164
	5	120.714	108.509	117.227	96.444
	15	109.739	106.012	111.844	103.583
A498	Drug1:	CHIR99021
	Drug2:	Etoposid
	ConcUnit:	µM
		0	0.2	1	5
	0	100	87.2521	73.4193	51.9352
	2	88.9488	80.9728	56.305	53.4545
	5	66.756	47.9099	37.0325	34.8634
	15	40.1343	30.8798	23.9554	23.3855
MFE296	Drug1:	CHIR99021
	Drug2:	Etoposid
	ConcUnit:	µM
		0	0.2	1	5
	0	100	99.5208	98.9875	66.2785
	2	98.3046	100.866	105.32	64.7124
	5	106.363	102.623	104.744	56.2346
	15	90.4574	90.2817	97.0986	46.1615

## Sheet: CHIR99021_MK1775
cell line
HCC44	Drug1:	CHIR99021
	Drug2:	MK1775
	ConcUnit:	µM
		0	0.05	0.25	0.5
	0	100	105.464	109.019	92.4753
	2	119.226	107.416	114.603	74.3798
	5	127.788	129.813	91.918	47.4628
	15	26.0659	22.7921	11.1809	5.57377
A549	Drug1:	CHIR99021
	Drug2:	MK1775
	ConcUnit:	µM
		0	0.05	0.25	0.5
	0	100	113.724	97.6282	101.291
	2	101.332	98.8641	91.3257	101.099
	5	111.363	107.319	100.103	93.395
	15	116.286	115.81	78.5212	67.9636
639V	Drug1:	CHIR99021
	Drug2:	MK1775
	ConcUnit:	µM
		0	0.05	0.25	0.5
	0	100	117.898	116.894	101.251
	2	105.268	94.5719	94.3137	72.6506
	5	117.565	109.128	92.4985	66.794
	15	116.119	107.306	94.7104	64.2106
H1975	Drug1:	CHIR99021
	Drug2:	MK1775
	ConcUnit:	µM
		0	0.05	0.25	0.5
	0	100	107.959	69.3314	47.0398
	2	96.3609	87.1863	71.8597	49.4251
	5	78.4399	76.4709	54.5329	40.8198
	15	51.0327	46.9828	32.1074	26.895
Calu1	Drug1:	CHIR99021
	Drug2:	MK1775
	ConcUnit:	µM
		0	0.05	0.25	0.5
	0	100	105.124	84.865	65.5357
	2	102.152	93.593	71.9936	51.9069
	5	86.7474	85.6996	55.1632	43.8398
	15	72.4276	59.2217	46.7691	38.3939
MelJuso	Drug1:	CHIR99021
	Drug2:	MK1775
	ConcUnit:	µM
		0	0.05	0.25	0.5
	0	100	108.882	102.05	112.116
	2	115.141	125.873	102.987	114.573
	5	120.714	131.715	108.969	121.561
	15	109.739	111.593	94.4106	110.83
A498	Drug1:	CHIR99021
	Drug2:	MK1775
	ConcUnit:	µM
		0	0.05	0.25	0.5
	0	100	102.872	21.0376	15.9898
	2	88.9488	81.5414	23.6635	18.9675
	5	66.756	56.3764	23.8552	18.8295
	15	40.1343	31.2534	20.6753	18.3833
MFE296	Drug1:	CHIR99021
	Drug2:	MK1775
	ConcUnit:	µM
		0	0.05	0.25	0.5
	0	100	111.335	112.757	104.322
	2	98.3046	107.443	122.477	103.295
	5	106.363	116.496	112.308	101.147
	15	90.4574	95.8305	98.9796	90.2448

## Sheet: CHIR99021_Dorsomorphin-HCI
cell line
HCC44	Drug1:	CHIR99021
	Drug2:	Dorsomorphin-HCI
	ConcUnit:	µM
		0	0.5	2	3.5
	0	100	137.713	114.887	50.7721
	2	119.226	143.681	77.2014	22.2518
	5	127.788	135.68	40.6337	13.1254
	15	26.0659	18.925	10.9604	32.8946
A549	Drug1:	CHIR99021
	Drug2:	Dorsomorphin-HCI
	ConcUnit:	µM
		0	0.5	2	3.5
	0	100	115.005	113.794	81.3412
	2	101.332	99.8251	97.2293	80.721
	5	111.363	110.018	107.207	78.9845
	15	116.286	104.3	70.7427	31.2563
639V	Drug1:	CHIR99021
	Drug2:	Dorsomorphin-HCI
	ConcUnit:	µM
		0	0.5	2	3.5
	0	100	113.624	113.784	102.678
	2	105.268	103.38	104.684	84.8901
	5	117.565	105.881	111.246	94.7255
	15	116.119	115.894	112.394	61.7264
H1975	Drug1:	CHIR99021
	Drug2:	Dorsomorphin-HCI
	ConcUnit:	µM
		0	0.5	2	3.5
	0	100	119.664	91.5841	43.1132
	2	96.3609	89.4276	54.656	32.2642
	5	78.4399	73.9065	45.6319	21.1453
	15	51.0327	49.9824	20.9974	16.6989
Calu1	Drug1:	CHIR99021
	Drug2:	Dorsomorphin-HCI
	ConcUnit:	µM
		0	0.5	2	3.5
	0	100	114.554	103.937	83.1124
	2	102.152	99.8055	92.3014	75.9405
	5	86.7474	84.3835	76.9355	61.9414
	15	72.4276	73.0145	64.602	48.8161
MelJuso	Drug1:	CHIR99021
	Drug2:	Dorsomorphin-HCI
	ConcUnit:	µM
		0	0.5	2	3.5
	0	100	97.3024	75.5908	78.2824
	2	115.141	95.2054	88.8372	81.8163
	5	120.714	102.319	96.6411	84.1062
	15	109.739	93.0496	92.7722	89.8133
A498	Drug1:	CHIR99021
	Drug2:	Dorsomorphin-HCI
	ConcUnit:	µM
		0	0.5	2	3.5
	0	100	116.261	108.037	81.0713
	2	88.9488	96.9768	98.448	78.1303
	5	66.756	82.5644	76.3268	58.6882
	15	40.1343	52.0948	46.5997	18.0777
MFE296	Drug1:	CHIR99021
	Drug2:	Dorsomorphin-HCI
	ConcUnit:	µM
		0	0.5	2	3.5
	0	100	101.697	92.5405	76.5738
	2	98.3046	90.6299	97.9255	86.7119
	5	106.363	91.1148	95.9685	88.9859
	15	90.4574	93.0213	89.3994	68.5151

## Sheet: OSI906_Etoposide
cell line
HCC44	Drug1:	OSI906
	Drug2:	Etoposid
	ConcUnit:	µM
		0	0.2	1	5
	0	100	102.593	124.659	99.6182
	2	83.6606	91.9754	91.0319	82.292
	5	77.7033	81.0683	78.6084	74.4663
	10	67.4283	75.2414	70.719	69.1746
A549	Drug1:	OSI906
	Drug2:	Etoposid
	ConcUnit:	µM
		0	0.2	1	5
	0	100	101.222	96.7127	97.5215
	2	85.0991	84.4268	72.8792	67.8764
	5	65.9982	70.2736	59.4283	58.7437
	10	48.1382	50.6818	46.5014	45.6309
639V	Drug1:	OSI906
	Drug2:	Etoposid
	ConcUnit:	µM
		0	0.2	1	5
	0	100	106.07	122.529	131.668
	2	100.886	97.7289	102.698	101.78
	5	102.674	95.2019	109.208	83.4148
	10	92.5374	98.0842	97.5677	55.4057
H1975	Drug1:	OSI906
	Drug2:	Etoposid
	ConcUnit:	µM
		0	0.2	1	5
	0	100	99.927	96.9228	82.367
	2	88.3156	95.8599	85.8745	72.8525
	5	88.9836	87.1337	76.7865	62.8376
	10	66.2515	70.0688	64.7467	59.3867
Calu1	Drug1:	OSI906
	Drug2:	Etoposid
	ConcUnit:	µM
		0	0.2	1	5
	0	100	109.241	95.4976	99.0923
	2	103.208	104.488	89.9229	85.5741
	5	85.9924	93.1878	81.6222	71.4075
	10	65.2509	66.3779	60.1035	59.8271
MelJuso	Drug1:	OSI906
	Drug2:	Etoposid
	ConcUnit:	µM
		0	0.2	1	5
	0	100	101.424	118.557	133.307
	2	87.0392	87.291	90.9969	83.0033
	5	81.2355	76.7108	80.0486	68.3382
	10	70.8818	88.2235	67.4921	56.3679
A498	Drug1:	OSI906
	Drug2:	Etoposid
	ConcUnit:	µM
		0	0.2	1	5
	0	100	87.5529	74.323	51.7121
	2	85.5406	75.7292	71.1197	53.3275
	5	77.8932	68.0607	58.8996	47.1875
	10	64.1733	57.5682	44.7688	36.976
MFE296	Drug1:	OSI906
	Drug2:	Etoposid
	ConcUnit:	µM
		0	0.2	1	5
	0	100	96.3001	90.0627	65.2086
	2	76.6073	81.4489	83.8338	60.4941
	5	66.614	66.0146	70.2261	50.8171
	10	57.3526	57.4564	54.1341	39.1395

[truncated: 13 more sheets: OSI906_CP72714, OSI906_BX912, Abt199_Etoposide, LDK378_BX912, LDK378_Afatinib, LDK378_BGJ398, Olaparib_PF477736, Olaparib_CP724714, PF477736_Abt199, MK1775_PF477736, MK1775_VE822, MK1775_CP724714, CP724714_PF477736]
