# Supplementary material for: Dual Inhibition of GLUT1 and the ATR/CHK1 Kinase Axis Displays Synergistic Cytotoxicity in KRAS -Mutant Cancer Cells
Source: Oxford University Press journal article supplement (doi:10.1158/0008-5472.can-18-3959), 2019-08-12
Supplement: 00085472can183959-sup-213944_2_supp_5682751_pvysyh.xlsx [file 00085472can183959-sup-213944_2_supp_5682751_pvysyh.xlsx]

## Sheet: gammaH2AX
p-values related to Fig. 4C (yH2AX intensity)
significance was tested by one-way-ANOVA with Tukey’s Honest Significant Difference test
	HCC44	A549	H1975	A498
Ctrl vs CHK1i	0.997	0.995	0.997	0.245
Ctrl vs ATRi	0.998	1000	0.999	0.7444
Ctrl vs GLUT1i	0.998	0.429	0.993	1000
Ctrl vs CHK1i+GLUT1i	0.005	<0.001	0.662	0.023
Ctrl vs ATRi+GLUT1i	<0.001	<0.001	0.257	0.098
CHK1i vs CHK1i+GLUT1i	<0.001	<0.001	0.212	0.704
GLUT1i vs CHK1i+GLUT1i	0.012	<0.001	0.903	0.035
ATRi vs ATRi+GLUT1i	0.002	<0.001	0.437	0.699
GLUT1i vs ATRi+GLUT1i	0.002	<0.001	0.54	0.143

## Sheet: RPA70
p-values related to Fig. 4C (RPA70 intensity)
significance was tested by one-way-ANOVA with Tukey’s Honest Significant Difference test
	HCC44	A549	H1975	A498
Ctrl vs CHK1i	0.982	1000	0.998	0.074
Ctrl vs ATRi	1000	1000	0.717	0.145
Ctrl vs GLUT1i	0.031	<0.001	0.733	0.057
Ctrl vs CHK1i+GLUT1i	0.002	<0.001	0.967	0.486
Ctrl vs ATRi+GLUT1i	<0.001	<0.001	0.098	0.239
CHK1i vs CHK1i+GLUT1i	<0.001	<0.001	1000	0.844
GLUT1i vs CHK1i+GLUT1i	<0.001	0.208	0.984	0.78
ATRi vs ATRi+GLUT1i	<0.001	<0.001	0.72	1000
GLUT1i vs ATRi+GLUT1i	0.252	0.181	0.703	0.965
